# Supplementary material for: Highly multiplexed quantitative PCR-based platform for evaluation of chicken immune responses
Source: PLoS One. 2019 Dec 3;14(12):e0225658. doi: 10.1371/journal.pone.0225658 (PMC6890255; doi:10.1371/journal.pone.0225658)
Supplement: S1 Table — (XLSX) [file pone.0225658.s001.xlsx]

## Sheet: Sheet2
S1 Table. Results of search queries for creation of the gene list.
References	Studies	Type of platform used
[8]	Chicken PBL-derived macrophages stimulated with LPS	Microarray; GEO accession GSE1794
[9]	Human macrophages and dendritic cells stimulated with parasites	Affymetrix HU95A microarray; no accession number
[10]	Chicken heterophils from two distinct parental meat-type broiler lines stimulated with S. Enteritidis	44 K Agilent microarray; GEO accession: GSE9416
[11]	Chicken HD11 macrophage-like cell line stimulated with S. Typhimurium endotoxin	Affymetrix GeneChip; GEO accession GSE23881
[12]	Caecal response of Barred Rock chickens to C. jejuni infection	RNAseq; raw data as supplementary file
[13]	Human neutrophils stimulated with LPS	Affymetrix Human ST 1.0 exon array; GEO accession GSE35590
[14]	Chicken PBMCs response to S. Enteritidis infection	qPCR
[15]	Chicken bursal response to IBDV infection	Agilent microarray; no accession number
[16]	Human monocyte-derived dendritic cells stimulated with E. coli, Candida albicans, influenza virus	Human oligonucleotide microarray, no accession number
[17]	Bovine PBMC stimulated with LPS	5 K bovine macrophage specific cDNA microarray; no accession number
[18]	Pig macrophages stimulated with LPS	Affymetrix GeneChip Porcine Genome Array; GEO accession GSE30956
[19]	PBL from Mycobacterium bovis infected and non-infected Holstein-Friesian cattle	Affymetrix GeneChip Bovine Genome Array; GEO accession GSE33359
[20]	Chicken duodenal response to primary and secondary infections with Eimeria acervulina	9.6K avian intestinal intraepithelial lymphocyte cDNA microarray (AVIELA); GEO accession GSE16230
[21]	In vitro studies on monocyte-derived macrophages responses to M. synoviae and E. coli stimulation	Avian macrophage microarray (AMM) and the avian innate immunity microarray (AIIM); GEO accession GSE1794
[22]	Chicken embryo lung cells infected with ILTV	44 K Agilent custom microarray; GEO accession GPL6413
[23]	Caecal response to C. jejuni infection in two commercial broiler lines	44K Agilent microarray; GEO accession GSE10257
[24]	Mesenteric lymph nodes (MLN) from piglets infected with S. Typhimurium	qPCR
[25]	Human colonocyte line (HCA-7) incubated with C. jejuni	Affymetrix Human Genome U133A array; no accession number
[26]	Chicken embryo cells infected with avian metapneumovirus	cDNA microarray; no accession number
[27]	Human macrophages stimulated with multiple bacteria and bacterial components	Affymetrix Hu6800 GeneChip; no accession number
[28]	Chickens infected with avian influenza H9N2	Gallus gallus Roslin/ARK CoRe Array Ready Oligo Set V1.0; accession numbers: E-TABM-771 and E-TABM-772
[29]	Human peripheral blood-derived mononuclear cells stimulated with LPS	HG-U133 Plus2 GeneChip; GEO accession GSE5504
[30]	Chickens infected with IBDV	Microarray; accession number E-MEXP-756
[31]	In vitro studies on chicken splenocytes responses to NDV stimulation	Agilent microarray; no accession number
[32]	Neutrophils from Iberian pigs stimulated with LPS	Affymetrix Porcine GeneChip; no accession number
[33]	Chicken jejunal response to S. Enteritidis infection	ARK-genomics Gallus gallus 20 K; GEO accession GSE27069
[34]	Human U937 cells stimulated with LPS	custom DNA microarray; accession number E-WMIT-6
[35]	Porcine alveolar macrophage responses to Haemophilus parasuis	Affymetrix GeneChip Porcine Genome Array; GEO accession GSE30172
[36]	Chicken embryo cell lines infected with avian influenza virus	Agilent complete chicken genome (42K) microarray
