# Supplementary material for: Highly multiplexed quantitative PCR-based platform for evaluation of chicken immune responses
Source: PLoS One. 2019 Dec 3;14(12):e0225658. doi: 10.1371/journal.pone.0225658 (PMC6890255; doi:10.1371/journal.pone.0225658)
Supplement: S2 Table — (XLSX) [file pone.0225658.s002.xlsx]

## Sheet: Sheet1
	S2 Table. List of differentially expressed genes from RNA-seq analysis
	BMDMs	BMDCs	Heterophils
1	5_8S_rRNA	5_8S_rRNA	5_8S_rRNA
2	7SK	7SK	5S_rRNA,ZMYM3
3	ABCG2,PKD2L1	ABCG2	ADAM28
4	ADM	ADM	ATF3
5	ADORA2B	AGO2	BCL2A1
6	APOLD1	BATF3	CD40
7	BATF3	BTBD11	CD83
8	BCDO2	C3orf52	COX8A		common between
9	BDKRB1	CD72	CSRNP1		BMDMs and BMDCs
10	BEST4	CRISPLD2	CXORF21		common between
11	C3orf52	CSF1	DTX2,UPK3B		BMDMs or BMDCs
12	CA9	CXCL13	EGR1		and heterophils
13	CCL19	CXCL13L2	G0S2		common between
14	CD40	DLG3	IL10RA		all cell types
15	CD72	EAF2	IL-12B		common rRNA
16	COLQ	F3	IL1R2
17	CXCL13	G0S2	IL4I1
18	CXCL13L2	GLUL	IL6
19	CXORF21	IL13RA2	IRG1
20	DLG3	IL17REL	K60
21	DTX2,UPK3B	IL19	LACC1
22	EAF2	IL-1BETA	LICOS
23	EDN1	IL4I1	MIP-3ALPHA
24	ETS2	K60	MLKL,RFWD3
25	FAM198B	LAT2	NR4A3
26	GABRA5	MADPRT	PIM3
27	GCH1	MAFA	RABIF
28	gga-mir-146a	MAFF	RASD1
29	GLUL	MARCKSL1	SNX10
30	GPR19	MPP2	STEAP4
31	GRB10	NDNF	TAGAP
32	HEY1	NFKB2	TGM4
33	HHIP	NLRC5	TLR15
34	HPS5,SAAL1	PFKFB3	TLR4
35	IFNG	PLK3	WDR24,gga-mir-6643
36	IL17REL	PTGS2
27	IL19	RNaseP_nuc
38	IL20RA	RNF19B
39	IL6	SAAL1
40	LAMP5	SELE
41	LYG2	SERPINE2
42	MADPRT	SLCO6A1
43	MAFA	SOCS1
44	MARCKSL1	SOCS3
45	MGAT3	STEAP1
46	NDNF	STEAP4
47	PFKFB3	TGM2
48	PLA2G5	TGM4
49	PLK3	TNIP2
50	PLXDC2	UPP1
51	PODN
52	PTGS2
53	RGCC
54	SDC4
55	SERPINE2
56	SLC39A8
57	SLC44A3
58	SLC46A2
59	SLCO6A1
60	SOCS1
61	SOCS3
62	SPTSSB
63	ST3GAL6
64	STEAP1
65	TGFB2
66	TGM4
67	TNFRSF6B
68	TNIP2
69	TP53I11
