# Supplementary material for: Highly multiplexed quantitative PCR-based platform for evaluation of chicken immune responses
Source: PLoS One. 2019 Dec 3;14(12):e0225658. doi: 10.1371/journal.pone.0225658 (PMC6890255; doi:10.1371/journal.pone.0225658)
Supplement: S4 Table — (XLSX) [file pone.0225658.s004.xlsx]

## Sheet: Sheet1
S4 Table. Reference gene primers and accession numbers
Gene symbol	Sequence	exon-intron	Amplicon length [bp]	Accession number
ACTB	F: CCAGACATCAGGGTGTGATGG	FWD	137	AJ719605
	R: CTCCATATCATCCCAGTTGGTGA	1-2 exon
B2M	F: TACTCCGACATGTCCTTCAACG	REV	150	AB162661
	R: TCAGAACTCGGGATCCCACTT	2-3 exon
GAPDH	F: GAAGGCTGGGGCTCATCTG	FWD	150	AF047874
	R: CAGTTGGTGGTGCACGATG	3-4 exon
GUSB	F: GGCAGACTGGTCCTGTTGTTG	FWD	64	AJ720880
	R: GGGTCCTGAGTGATGTCATTGA	1-2 exon
TBP	F: AGCTCTGGGATAGTGCCACAG	REV	134	AF221563
	R: ATAATAACAGCAGCAAAACGCTTG	3-4 exon
TUBAT	F: CAGCTCTCAGTGGCTGAAATCA	Does not span ex-in boundaries	77	M16030
	R: CCTTGTTGCGGGTCACACTT
r28S	F: GGCGAAGCCAGAGGAAACT	Ribosomal RNA	62	FM165415
	R: GACGACCGATTTGCACGTC
